# Supplementary material for: Association between coronary artery disease and incident cancer risk: a systematic review and meta-analysis of cohort studies
Source: PeerJ journal article supplement (doi:10.7717/peerj.14922), 2023-02-23
Supplement: replicate.pdf [file replicate.pdf]

# Association between coronary artery disease and incident cancer risk: a systematic review and meta-analysis of cohort studies

*By* HsinHao Chen

- 1 **Association between coronary artery disease and incident cancer risk: a**
- 2 **systematic review and meta-analysis of cohort studies**

3 **Abstract**

4 **Objective:** Coronary artery disease (CAD) and cancer are the two leading causes  
5 of death worldwide. Evidence suggests the existence of shared mechanisms for these  
6 two diseases. We aimed to conduct a systematic review and meta-analysis to  
7 investigate association between CAD and incident cancer risk.

8 **Methods:** We searched Cochrane, PubMed, and Embase from inception until  
9 October 20, 2021, without language restrictions. Observational cohort studies were  
10 used to investigate the association between CAD and incident cancer risk. Using  
11 random-effects models, the odds ratio (OR) and 95% confidence interval (CI) were  
12 calculated. We utilized subgroup and sensitivity analyses to determine the potential  
13 sources of heterogeneity and explore the association between CAD and specific  
14 cancers. This study was conducted under a pre-established, registered protocol on  
15 PROSPERO (CRD42022302507).

16 **Results:** We initially examined 8,533 articles, and included 14 cohort studies in  
17 our review, 11 of which were eligible for meta-analysis. Patients with CAD had  
18 significantly higher odds of cancer risk than those without CAD (OR = 1.15, 95% CI  
19 = [1.08, 1.22],  $I^2 = 66%$ ). Subgroup analysis revealed that the incident cancer risk was  
20 significantly higher in both sexes and patients with CAD with or without myocardial  
21 infarction. Sensitivity analysis revealed that the risk remained higher in patients with

22 CAD even after >1 year of follow-up (OR = 1.23, 95% CI = [1.08, 1.39],  $I^2 = 76%$ ).  
23 Regarding the specific outcome, the incident risk for colorectal and lung cancers was  
24 significantly higher (OR = 1.06, 95% CI = [1.03, 1.10],  $I^2 = 10%$ , and OR = 1.36,  
25 95% CI = [1.15, 1.60],  $I^2 = 90%$ , respectively) and that for breast cancer was lower  
26 (OR = 0.86, 95% CI = [0.77, 0.97],  $I^2 = 57%$ ) in patients with CAD than in those  
27 without CAD.

28 **Conclusion:** CAD may be associated with incident cancer risk, particularly for  
29 lung and colorectal cancers, in men and women as well as patients with or without  
30 myocardial infarction. Early detection of new-onset cancer and detailed cancer  
31 surveillance programs should be implemented in patients with CAD to reduce cancer-  
32 related morbidity and mortality.

### 33 **Background**

34 Cancers and coronary artery disease (CAD) are <sup>3</sup>the two leading causes of death  
35 worldwide. They are closely associated with shared risk factors, which may indicate  
36 common biological characteristics, such as common pathways that result in smoking-  
37 related CAD and lung cancer.<sup>1</sup> Some studies have also suggested that cardiovascular  
38 diseases, such as myocardial infarction and cancer share similarities in terms of  
39 obesity, oxidative stress, and inflammation.<sup>2,3</sup> People with mild CAD before cancer  
40 <sup>3</sup>diagnosis may experience disease progression due to the cancer-induced  
41 proinflammatory and hypercoagulable states. Furthermore, CAD may cause a delay in  
42 the initiation of cancer treatment due to a decline in the patient's heart condition or  
43 increased risk of surgery.<sup>1</sup> Thus, early detection of neoplasm in patients with CAD  
44 through appropriate strategies is critical for reducing future morbidity.

45 Some studies have reported increased incidence of CAD and stroke after cancer  
46 diagnosis. Various radio- and chemotherapeutic agents may affect the development  
47 and progression of cardiovascular disease.<sup>4-7</sup> Further, several studies have indicated a  
48 high prevalence of occult cancer in patients with cardiovascular disease and reported  
49 that it is important to identify cancer risk factors as it may aid in developing new and  
50 effective preventive strategies.<sup>8-10</sup>

51 In contrast, several recent clinical and epidemiological studies have revealed a  
52 link between myocardial infarction and new-onset cancer;<sup>11,12</sup> however, the findings

53 were inconsistent and contradictory.<sup>13, 14</sup> According to a systematic review, increased  
54 cancer risk after myocardial infarction was only significant in women and patients  
55 with certain cancers such as lung cancer. However, some of the review's analytic  
56 findings were based on only two or three studies and it only included patients with  
57 myocardial infarction, not all patients with CAD.<sup>15</sup> Recently, a large cohort study  
58 demonstrated that atherosclerotic cardiovascular disease itself increased cancer  
59 incidence after a median follow-up of 1,020 days.<sup>16</sup> Thus, the potential of CAD as a  
60 causal factor in cancer remains unknown. Furthermore, it has not yet been elucidated  
61 whether occult cancer occurs before the emergence of CAD. Therefore, this study  
62 aimed to conduct a comprehensive systematic review and meta-analysis to determine  
63 the association between CAD and incident cancer risk.

64 **Methods**

65 *Data sources and study selection*

66 This systematic review followed the Preferred Reporting Items for Systematic  
67 Reviews and Meta-Analyses (PRISMA) guidelines (Table S1).<sup>17</sup> This protocol was  
68 registered into the PROSPERO International Prospective Register of Systematic  
69 Reviews (CRD42022302507).

70 The first author (Hsin-Hao Chen, HHC) and a medical librarian (Shu-Jung Liu,  
71 SJL) independently conducted an unrestricted search of electronic databases  
72 (Cochrane, PubMed, Embase [excluding Medline], and Taiwan Airiti Library) from  
73 inception until October 20, 2021. The following search terms were used: coronary  
74 artery disease, atherosclerosis, ischemic heart disease, myocardial infarction,  
75 neoplasms, cancer, and malignancy. The disagreements between the authors were  
76 resolved by a third reviewer (Tzu-Lin Yeh, TLY). We also examined potentially  
77 relevant studies in the references of relevant articles. Table S1 presents a complete  
78 description of the search strategies.

79 To identify eligible studies, we first removed duplicates. Two authors (Yi-Chi  
80 Lo, YCL and Wei-Sheng Pan, WSP) independently screened the titles and abstracts of  
81 each article, followed by a review of the full texts. If there was a disagreement, the  
82 third author (HHC) was consulted to reach consensus. Studies were included if they  
83 met the following criteria: (1) retrospective or prospective cohort studies; (2) studies

84 investigating the association between fatal or nonfatal CAD and cancer risk; (3)  
85 studies wherein cancer occurred after CAD diagnosis; and (4) studies reporting  
86 adjusted cancer relative risk (RR), odds ratio (OR), and hazard ratio (HR) with 95%  
87 confidence interval (CI). Further, the exclusion criteria were as follows: (1) animal  
88 studies; (2) cross-sectional and case-control studies wherein cancer may have  
89 occurred before or concurrently with CAD; (3) nonobservational article types; (4)  
90 studies that did not report the relevant data for extraction; or (5) literature reviews,  
91 republished data, case reports, dissertations, editorial, letter, or conference abstracts.  
92 We initiated the formal screening of search results while registering the protocol into  
93 PRSOPERO because we were afraid that the COVID-19 pandemic would affect the  
94 writing and review process at that time.

95

96 *Data extraction and quality assessment*

97 Two authors (YCL and WSP) independently extracted the following data from  
98 each included article: first author, publication year, publication country, study design,  
99 CAD type, number of enrolled participants, age, follow-up duration, adjusted factors,  
100 cancer type, and main results (Table 1). Any disagreements were resolved through  
101 discussion with the third author (HHC). If any information was missing from the  
102 study results, the authors of original studies were contacted via email. The Newcastle



103 Ottawa Scale (NOS)<sup>18</sup> was used by two authors (HHC and YCL) to independently  
104 assess the quality of the included studies. In cohort studies, the quality assessment  
105 tool (NOS) was used to rate each study in three domains—selection, comparability,  
106 and outcome—using a star system, with scores ranging from 0 to 9 stars.<sup>19</sup> The  
107 selection domain indicates representativeness of the exposed cohort, selection of the  
108 nonexposed cohort, and determination of exposure and outcome of interest that were  
109 absent at the beginning of the study. The comparability domain indicates whether  
110 exposed and nonexposed cohorts matched in the study design and/or whether  
111 confounders were adjusted for in the analysis. The outcome domain indicates whether  
112 the data were assessed accurately and whether the follow-up was adequate. If there  
113 was disagreement between two authors, the corresponding author (Tzu-Lin Yeh)  
114 made the final decision. A cohort study was considered to be of high quality if it  
115 received at least 6 stars.

116

117 *Statistical analysis and data synthesis*

118 We calculated pooled ORs with 95% CIs to estimate incident cancer risk in  
119 patients with CAD and compared it with that in patients without CAD. For our meta-  
120 analysis, we used statistical computing software R, version 4.1.2 (RStudio, Inc.,  
121 Boston, MA, USA), primarily the Comprehensive R Archive Network package

122 “metagen.”<sup>20</sup> Subsequently, we employed a random-effects model based on the  
123 DerSimonian and Laird’s method with an assumption of nonidentical true effect  
124 sizes.<sup>21</sup> These results were presented as forest plots. Furthermore, heterogeneity  
125 among studies was quantified using Cochran’s Q test and  $I^2$  statistics, and a  $p$ -value of  
126  $<0.05$  in the Q test or  $I^2$  value of  $>50\%$  indicated the presence of heterogeneity.<sup>22</sup>  
127 Subgroup analysis was determine to assess the potential origins of heterogeneity. We  
128 did not perform a meta-regression analysis using patient characteristics, as some  
129 studies did not provide enough study-level variable information.<sup>12, 23</sup> Thus, this  
130 method would have been unsuitable, according to the methodological standards for  
131 meta-analysis and qualitative systematic reviews.<sup>24</sup> We investigated the association  
132 between CAD and different cancers, including lung, colorectal, breast, liver, and  
133 prostate cancers. To assess the robustness of the results, we performed a sensitivity  
134 analysis that included only studies with a follow-up time of  $>1$  year. The risk of  
135 publication bias was assessed using funnel plots and Egger’s test.<sup>25</sup>

136 **Results**

137 *Study characteristics and quality assessment*

138 Figure 1 presents the article selection flowchart. Initially, we obtained 8,533  
139 articles from databases and by hand searching. Subsequently, we removed duplicates,  
140 reviewed titles and abstracts, and retrieved and evaluated 25 full-text articles for  
141 eligibility. After excluding articles with duplicate populations or those incompatible  
142 with the inclusion criteria, our systematic review included 14 cohort studies, 11 of  
143 which were eligible for meta-analysis (Fig.1).

144 Table 1 summarizes the general demographic characteristics of the included  
145 studies in the systematic review. Of the included studies, only two<sup>16,26</sup> were  
146 conducted in Asia, whereas other studies were from USA or Europe. Four studies  
147 included patients with myocardial infarction identified via discharge diagnosis with  
148 Internal Classification of Disease (ICD) codes,<sup>12-14,27</sup> whereas other studies included  
149 patients with CAD identified via hospital medical records, discharge diagnosis with  
150 ICD codes, or computed tomography scan with coronary artery calcium (CAC) score  
151 of >0. The duration of follow-up ranged from <1 year to a maximum of 33 years.  
152 Furthermore, we confirmed that the diagnosis of CAD was made before the  
153 occurrence of cancer in all included studies. Considering the cancer type, most studies  
154 investigated the incidence of all cancers, whereas other studies only assessed specific  
155 cancers, such as colorectal cancer,<sup>23,27</sup> or cancers specific to men (prostate) or

156 women.<sup>23,28</sup> Regarding the outcomes, a study only reported the incidence rate,<sup>29</sup>  
157 whereas other studies provided the overall or subgroup effect estimates of RR, OR,  
158 and HR with 95% CI.

159 In our study quality assessment, we observed that only one study did not report  
160 the items of selection and comparability domain and, as such, did not meet our  
161 criteria<sup>11</sup>. All other included studies received at least 6 of 9 stars on the NOS quality  
162 assessment scale, indicating high quality. Tables S3 presents the detailed results.

### 163 *Results of meta-analysis*

164 We pooled 11 studies for meta-analysis, which included >1,321,978 patients;  
165 however, one of these studies<sup>12</sup> did not specify the number of participants. **2** Patients  
166 with CAD had significantly higher odds of cancer risk than those without CAD (OR =  
167 1.15, 95% CI = [1.08, 1.22],  $I^2 = 66%$ ; forest plot shown in Fig.2). Subgroup analyses  
168 were performed based on the heterogeneity in the country and CAD type of patients.  
169 **2** Patients with CAD had significantly higher odds of cancer risk than those without  
170 CAD in non-Asian regions (OR = 1.15, 95% CI = [1.08, 1.23],  $I^2 = 67%$ ; Fig.S1).  
171 Furthermore, Asian patients with CAD showed nonsignificantly higher odds of cancer  
172 risk than those without CAD (OR = 1.17, 95% CI = [0.89, 1.53],  $I^2 = 67%$ ; Fig.S1).  
173 We also conducted a subgroup analysis by CAD subtype, which revealed that those  
174 with or without myocardial infarction had significantly higher odds of cancer risk

175 among patients with CAD than among those without CAD (OR = 1.11, 95% CI =  
176 [1.00, 1.23],  $I^2 = 89%$  and OR = 1.17, 95% CI = [1.08, 1.27],  $I^2 = 51%$ , respectively;  
177 Fig.S2).

#### 178 *Subgroup analysis by sex*

179 We also performed pooled analyses in a random-effects model based on sex.  
180 This analysis was conducted when the studies indicated the odds of cancer risk by  
181 individual sex. After pooling seven studies,<sup>11-14, 23, 28, 30</sup> the overall risk of cancer  
182 incidence in men with CAD was higher than that in those without CAD (OR = 1.12,  
183 95% CI = [1.03, 1.22],  $I^2 = 61%$ ; Fig.3-1). Furthermore, after pooling six studies,<sup>11-14,</sup>  
184 <sup>23, 30</sup> women with CAD showed a higher incident cancer risk than those without CAD  
185 (OR = 1.08, 95% CI = [1.00, 1.16],  $I^2 = 56%$ , Fig.3-2).

#### 186 *Subgroup analysis by different outcome*

187 We determined whether CAD exerted different effects on different types of  
188 <sup>4</sup> cancer. Patients with CAD had a significantly higher risk of colorectal and lung  
189 cancers than those without CAD (OR = 1.06, 95% CI = [1.03, 1.10],  $I^2 = 10%$ ; Fig.4-1  
190 and OR = 1.36, 95% CI = [1.15, 1.60],  $I^2 = 90%$ , respectively; Fig.4-2), as determined  
191 after pooling four<sup>12, 26, 27, 30</sup> and five<sup>11-13, 26, 30</sup> studies, respectively. However,  
192 according to the odds of breast cancer risk in five studies,<sup>11-13, 26, 30</sup> a lower risk was  
193 observed among patients with CAD than among those without CAD (OR = 0.86, 95%

194 CI = [0.77, 0.97],  $I^2 = 57%$ ; Fig.4-3). Furthermore, compared with patients without  
195 CAD, a nonsignificantly increased risk of prostate and liver cancers was observed in  
196 those with CAD (OR = 1.04, 95% CI = [0.94, 1.16],  $I^2 = 72%$ ; Fig.S3-1 and OR =  
197 1.03, 95% CI = [0.88, 1.21],  $I^2 = 59%$ , respectively; Fig.S3-2), as determined after  
198 pooling seven<sup>11-13, 23, 26, 28, 30</sup> and three<sup>11, 12, 26</sup> studies, respectively.

199 *Sensitivity analysis and publication bias*

200 We analyzed six studies in which all patients had a follow-up time of >1 year.<sup>14,</sup>  
201 <sup>23, 26, 27, 31, 32</sup> The incident cancer risk was still higher in patients with CAD than in  
202 those without CAD (OR = 1.23, 95% CI = [1.08, 1.39],  $I^2 = 76%$ ; Fig.S4). Funnel  
203 plots revealed asymmetry for publication bias, as shown in Fig.S5. In addition,  
204 Egger's test revealed a significant publication bias ( $p = 0.06$ ).

205 **Discussion**

206 Our meta-analysis revealed <sup>2</sup> that patients with CAD had significantly higher odds  
207 of cancer risk than those without CAD among cohort studies. Subgroup analysis  
208 indicated that cancer risk was significantly higher in both men and women, those with  
209 and without myocardial infarction, and non-Asian patients. Moreover, for specific  
210 cancer types, patients with CAD had a higher risk of colorectal and lung cancers,  
211 nonsignificantly higher risk of prostate and liver cancers, and lower risk of breast  
212 cancer.

213 A previous systematic review of myocardial infarction based on only three  
214 studies revealed that the incident cancer risk in the test group was nonsignificantly  
215 higher (OR = 1.08, 95% CI = [0.97, 1.19]) than that in the control group. However,  
216 subgroup analysis revealed that the overall cancer risk was higher in women and  
217 during the first 6 months following myocardial infarction diagnosis.<sup>15</sup> Further, our  
218 meta-analysis of eleven studies revealed a significantly higher incident cancer risk in  
219 patients with CAD with or without myocardial infarction. One of the differences in  
220 the outcomes of patients with myocardial infarction is the number of cohort  
221 participants included in the meta-analysis. As the 1998 study by Dreyer in Denmark<sup>11</sup>  
222 comprised only a small proportion (96891 people) of the 2013 study by Erichsen  
223 (297523 people),<sup>27</sup> we included a large cohort instead of a small cohort. Further, our

224 meta-analysis evaluated patients without myocardial infarction via CAC,  
225 percutaneous coronary intervention (PCI), or hospital discharge records to  
226 comprehensively assess cancer risk in patients with CAD.

227 CAD and incident cancer risk are mainly associated because of <sup>4</sup>the presence of  
228 shared <sup>4</sup>risk factors. As summarized <sup>4</sup>in the study by Hasin et al., cancer may be caused  
229 by treatment modalities or biological changes related to cardiovascular diseases.<sup>33</sup>

230 Other reviews have also indicated that inflammatory cytokines, such as  
231 interleukin(IL)-1, IL-6, IL-10, <sup>5</sup>tumor necrosis factor- $\alpha$ , macrophage migration  
232 inhibitory factor, and transforming growth factor- $\beta$ , are involved in tumor initiation  
233 and progression.<sup>34,35</sup> In addition to inflammation during the development of  
234 atherosclerosis and cancer, a recent review revealed that age-related mutations,  
235 obesity, smoking, and diabetes are overlapping risk factors between cancer and  
236 CAD.<sup>35</sup> Additionally, some observational studies have reported that noncardiac  
237 causes, such as malignancies, are responsible for most later deaths in patients with  
238 myocardial infarction treated with PCI.<sup>36,37</sup>

239 Conversely, some studies have suggested that the increased cancer risk  
240 immediately after myocardial infarction can be attributed to other confounding  
241 factors, such as surveillance bias, rather than myocardial infarction itself. Patients  
242 with myocardial infarction had frequent clinical appointments and underwent more



243 diagnostic examinations, especially in the first few months after the event, which may  
244 increase the likelihood of early cancer detection.<sup>13, 15</sup> This situation is not only  
245 observed in patients with myocardial infarction but also in those without. Other  
246 studies have shown that occult cancers could have occurred before the cardiovascular  
247 event if cancer incidence is observed immediately after the start of myocardial  
248 infarction follow-up.<sup>38</sup> In some patients, an underlying malignancy can cause an  
249 ischemic stroke. The effects of the coagulation cascade, tumor mucin secretion,  
250 infections, and nonbacterial endocarditis may contribute to the mechanisms.<sup>39</sup> Thus,  
251 occult cancer may also contribute to the development of CAD. However, our  
252 sensitivity analysis revealed that patients with CAD continue to have an increased  
253 incident cancer risk after >1 year of follow-up, which differs from the meta-analysis  
254 based on only two studies reporting that cancer risk is only significant in the first 6  
255 months. Another study revealed that although the cancer risk is the highest in the first  
256 year following myocardial infarction, cancer develops over time.<sup>13</sup> According to  
257 a recent large-scale cohort study, atherosclerotic cardiovascular disease increases the  
258 incident cancer risk after a median follow-up of 1,020 days.<sup>16</sup> Moreover, the risk is  
259 increased when patients with CAD concomitantly have aortic and peripheral artery  
260 disease with a median follow-up of 3 years.<sup>40</sup> Therefore, CAD may affect long-term  
261 cancer incidence.

262 Our study revealed that CAD events increased the risk of lung and colorectal  
263 cancers but decreased the risk of breast cancer. We determined that “smoking,” a  
264 well-known cause of lung and colorectal cancers, was a common risk factor. This may  
265 account for some of our findings that indicate that the risk of both cancers was  
266 significantly increased after CAD.<sup>41</sup> Another reason for an increase in lung cancer  
267 incidence may be that cardiac scanning includes the lungs; thus, lung cancers account  
268 for most detected cancers.<sup>30</sup> Diabetes is a classic risk factor for CAD and is also  
269 related to elevated risk of cancer, especially colorectal cancer.<sup>35</sup> A study showed that  
270 patients with diabetes had a 20%–38% higher cancer risk than those without  
271 diabetes.<sup>42</sup> Moreover, modifiable environmental 1 risk factors, such as obesity, lack of  
272 physical activity, and westernized diet, may predispose individuals to CAD and  
273 colorectal cancer.<sup>43</sup> According to two large prospective cohort studies, a high intake  
274 of animal fat or processed red meat and low intake of fiber could increase the risk of  
275 CAD and colon cancer.<sup>44, 45</sup> One possible explanation for the lower risk of breast  
276 cancer in our study is life-long aspirin treatment, as recommended by CAD  
277 guidelines,<sup>46</sup> which may also affect carcinogenesis. Large-scale cohort studies have  
278 consistently demonstrated the protective effects of low-dose aspirin for treating breast  
279 cancers.<sup>46, 47</sup> However, there is limited evidence to support the association between  
280 CAD and breast cancer and we cannot exclude the possible selection bias; therefore,

281 more research is warranted in this regard.

282 This is the first study to conduct a comprehensive review and meta-analysis of  
283 the association between CAD and incident cancer risk with regard to patients with or  
284 without myocardial infarction as well as different cancer types. However, there are  
285 some limitations that must be addressed. First, our meta-analysis had significant  
286 publication bias, indicating that some nonsignificant studies are not published. This  
287 would weaken the positive association between CAD and incident cancer risk  
288 observed in our study. However, current evidence was the best available, and all  
289 studies, including several population-based cohort studies, were of moderate-to-high  
290 quality. Second, not all included studies could distinguish the length of follow-up and  
291 different cancer types. Our findings showed that the cancer risk remains elevated even  
292 at 1 year of follow-up after a CAD event, which contradicts the findings of the  
293 previous two studies.<sup>13,26</sup> According to our subgroup analysis, CAD may have  
294 different effects on different cancer types. Additional studies with subgroup analysis  
295 of follow-up time and different types of cancer are thus warranted to investigate the  
296 association between CAD and incident cancer risk. Third, most studies did not  
297 provide data regarding heart failure or left ventricular ejection fraction. Recently,  
298 Meijers et al. indicated that heart failure stimulates tumor growth via cardiac-excreted  
299 circulating factors.<sup>48</sup> Furthermore, heart failure is associated with cancer incidence<sup>33</sup>

300 and could become a confounding factor in future research.

301

## 302 **Conclusions**

303       Based on our analysis of newly published data, we observed an increased risk of  
304 incident cancer after a CAD event. This was observed in men and women as well as  
305 patients with cancers, particularly lung and colorectal cancers, with or without  
306 myocardial infarction. Although this trend may be attributable to several common risk  
307 factors and underlying pathophysiologic mechanisms such as inflammation, patients  
308 with a history of CAD are still more likely to develop cancer. As CAD and cancer are  
309 the two leading causes of death, treatment of any one disease may affect the  
310 occurrence of the other. Therefore, more research is warranted regarding the causes of  
311 malignancy. Further, detailed cancer surveillance and possible interventions in the  
312 CAD population should be implemented to reduce cancer-related morbidity and  
313 mortality.

314

## 315 **Acknowledgments**

316       We would like to thank the MacKay Memorial Hospital librarian, Pei-jin Li, for  
317 examining the references. We would like to thank Romy E ([www.enago.tw](http://www.enago.tw)) for  
318 editing and proofreading the manuscript. The research did not receive any specific  
319 grants from funding agencies in the public, commercial or not-for-profit sectors.

320 **Competing interests statement**

321 All authors declare that there is no conflict of interest regarding the publication of this  
322 study.

323

324 **Data availability**

325 The datasets during and/or analyzed during the current study is available as attached  
326 file.

327

Reference

- 328 1. Das D, Asher A, Ghosh AK. Cancer and Coronary Artery Disease: Common  
329 Associations, Diagnosis and Management Challenges. *Curr Treat Options Oncol*  
330 2019;20:46.
- 331 2. Koene RJ, Prizment AE, Blaes A, Konety SH. Shared Risk Factors in  
332 Cardiovascular Disease and Cancer. *Circulation* 2016;133:1104-14.
- 333 3. Pischon T, Nimptsch K. Obesity and Risk of Cancer: An Introductory Overview.  
334 *Recent Results Cancer Res* 2016;208:1-15.
- 335 4. Arthurs E, Hanna TP, Zaza K, Peng Y, Hall SF. Stroke After Radiation Therapy  
336 for Head and Neck Cancer: What Is the Risk? *Int J Radiat Oncol Biol Phys*  
337 2016;96:589-96.
- 338 5. Navi BB, Reiner AS, Kamel H, Iadecola C, Elkind MS, Panageas KS, et al.  
339 Association between incident cancer and subsequent stroke. *Ann Neurol* 2015;77:291-  
340 300.
- 341 6. Zöller B, Ji J, Sundquist J, Sundquist K. Risk of coronary heart disease in  
342 patients with cancer: a nationwide follow-up study from Sweden. *Eur J Cancer*  
343 2012;48:121-8.
- 344 7. Zhang F, Wang K, Du P, Yang W, He Y, Li T, et al. Risk of Stroke in Cancer  
345 Survivors: A Meta-analysis of Population-Based Cohort Studies. *Neurology*

- 346 2021;96:e513-e26.
- 347 8. Corraini P, Szépligeti SK, Henderson VW, Ording AG, Horváth-Puhó E,  
348 Sørensen HT. Comorbidity and the increased mortality after hospitalization for stroke:  
349 a population-based cohort study. 2018;16:242-52.
- 350 9. Tybjerg AJ, Skyhøj Olsen T, Andersen KK. Prevalence and risk of occult cancer  
351 in stroke. *Acta neurologica Scandinavica* 2020;141:204-11.
- 352 10. Wang FM, Reiter-Brennan C, Dardari Z, Marshall CH, Nasir K, Miedema MD,  
353 et al. Association between coronary artery calcium and cardiovascular disease as a  
354 supporting cause in cancer: The CAC consortium. *Am J Prev Cardiol* 2020;4:100119.
- 355 11. Dreyer L, Olsen JH. Cancer risk of patients discharged with acute myocardial  
356 infarct. *Epidemiology* 1998;9:178-83.
- 357 12. Pehrsson SK, Linnarsjö A, Hammar N. Cancer risk of patients with ischaemic  
358 syndromes. *J Intern Med* 2005;258:124-32.
- 359 13. Malmborg M, Christiansen CB, Schmiegelow MD, Torp-Pedersen C, Gislason  
360 G, Schou M. Incidence of new onset cancer in patients with a myocardial infarction -  
361 a nationwide cohort study. *BMC Cardiovasc Disord* 2018;18:198.
- 362 14. Rinde LB, Smabrekke B, Hald EM, Brodin EE, Njolstad I, Mathiesen EB, et al.  
363 Myocardial infarction and future risk of cancer in the general population-the Tromso  
364 Study. *Eur J Epidemiol* 2017;32:193-201.

- 365 15. Li N, Huang Z, Zhang Y, Sun H, Wang J, Zhao J. Increased cancer risk after  
366 myocardial infarction: fact or fiction? A systemic review and meta-analysis. *Cancer*  
367 *Manag Res* 2019;11:1959-68.
- 368 16. Suzuki M, Tomoike H, Sumiyoshi T, Nagatomo Y, Hosoda T, Nagayama M, et  
369 al. Incidence of cancers in patients with atherosclerotic cardiovascular diseases. *Int J*  
370 *Cardiol Heart Vasc* 2017;17:11-6.
- 371 17. Page MJ, McKenzie JE, Bossuyt PM, Boutron I, Hoffmann TC, Mulrow CD, et  
372 al. The PRISMA 2020 statement: an updated guideline for reporting systematic  
373 reviews. *Bmj* 2021;372:n71.
- 374 18. GA Wells, B Shea, D O'Connell, J Peterson, V Welch, M Losos, P Tugwell. The  
375 Newcastle-Ottawa Scale (NOS) for assessing the quality of nonrandomised studies in  
376 meta-analyses. Ottawa Hospital Research Institute. Available at:  
377 [https://www.ohri.ca/programs/clinical\\_epidemiology/oxford.asp](https://www.ohri.ca/programs/clinical_epidemiology/oxford.asp). Accessed December  
378 20, 2022.
- 379 19. Zeng X, Zhang Y, Kwong JS, Zhang C, Li S, Sun F, et al. The methodological  
380 quality assessment tools for preclinical and clinical studies, systematic review and  
381 meta-analysis, and clinical practice guideline: a systematic review. *J Evid Based Med*  
382 2015;8:2-10.
- 383 20. Software R. Available at: <https://www.rstudio.com/products/rstudio/download/>.



384 Accessed September 1, 2022.

385 21. DerSimonian R, Laird N. Meta-analysis in clinical trials. *Control Clin Trials*

386 1986;7:177-88.

387 22. Higgins JP, Thompson SG. Quantifying heterogeneity in a meta-analysis. *Stat*

388 *Med* 2002;21:1539-58.

389 23. Dzaye O, Berning P, Dardari ZA, Mortensen MB, Marshall CH, Nasir K, et al.

390 Coronary artery calcium is associated with increased risk for lung and colorectal

391 cancer in men and women: the Multi-Ethnic Study of Atherosclerosis (MESA).

392 *European heart journal Cardiovascular Imaging* 2021.

393 24. Rao G, Lopez-Jimenez F, Boyd J, D'Amico F, Durant NH, Hlatky MA, et al.

394 Methodological Standards for Meta-Analyses and Qualitative Systematic Reviews of

395 Cardiac Prevention and Treatment Studies: A Scientific Statement From the American

396 Heart Association. *Circulation* 2017;136:e172-e94.

397 25. Egger M, Davey Smith G, Schneider M, Minder C. Bias in meta-analysis

398 detected by a simple, graphical test. *Bmj* 1997;315:629-34.

399 26. Kwak S, Choi YJ, Kwon S, Lee SY, Yang S, Moon I, et al. De novo malignancy

400 risk in patients undergoing the first percutaneous coronary intervention: A nationwide

401 population-based cohort study. *Int J Cardiol* 2020;313:25-31.

402 27. Erichsen R, Sværke C, Sørensen HT, Sandler RS, Baron JA. Risk of colorectal

- 403 cancer in patients with acute myocardial infarction and stroke: a nationwide cohort  
404 study. *Cancer Epidemiol Biomarkers Prev* 2013;22:1994-9.
- 405 28. Thomas JA, Gerber L, Bañez LL, Moreira DM, Rittmaster RS, Andriole GL, et  
406 al. Prostate cancer risk in men with baseline history of coronary artery disease: results  
407 from the REDUCE Study. *Cancer epidemiology, biomarkers & prevention*  
408 2012;21:576-81.
- 409 29. Berton G, Cordiano R, Cavuto F, Bagato F, Segafredo B, Pasquinucci M.  
410 Neoplastic disease after acute coronary syndrome: incidence, duration, and features:  
411 the ABC-4\* Study on Heart Disease. *J Cardiovasc Med (Hagerstown)* 2018;19:546-  
412 53.
- 413 30. Vinter N, Christesen AMS, Mortensen LS, Lindholt JS, Johnsen SP, Tjønneland  
414 A, et al. Relation of Coronary Artery Calcium Score and Risk of Cancer (from a  
415 Danish Population-Based Follow-up Study in Patients Who Underwent Cardiac  
416 Computed Tomography). *Am J Cardiol* 2017;120:542-9.
- 417 31. Handy CE, Desai CS, Dardari ZA, Al-Mallah MH, Miedema MD, Ouyang P, et  
418 al. The Association of Coronary Artery Calcium With Noncardiovascular Disease:  
419 The Multi-Ethnic Study of Atherosclerosis. *JACC Cardiovasc Imaging* 2016;9:568-  
420 76.
- 421 32. Peng AW, Mirbolouk M, Orimoloye OA, Osei AD, Dardari Z, Dzaye O, et al.

422 Long-Term All-Cause and Cause-Specific Mortality in Asymptomatic Patients With  
423 CAC  $\geq$ 1,000: Results From the CAC Consortium. *JACC Cardiovasc Imaging*  
424 2020;13:83-93.

425 33. Hasin T, Gerber Y, Weston SA, Jiang R, Killian JM, Manemann SM, et al. Heart  
426 Failure After Myocardial Infarction Is Associated With Increased Risk of Cancer. *J*  
427 *Am Coll Cardiol* 2016;68:265-71.

428 34. Amin MN, Siddiqui SA, Ibrahim M, Hakim ML, Ahammed MS, Kabir A, et al.  
429 Inflammatory cytokines in the pathogenesis of cardiovascular disease and cancer.  
430 *SAGE Open Medicine* 2020;8.

431 35. Leiva O, AbdelHameid D, Connors JM, Cannon CP, Bhatt DL. Common  
432 Pathophysiology in Cancer, Atrial Fibrillation, Atherosclerosis, and Thrombosis:  
433 JACC: CardioOncology State-of-the-Art Review. *JACC CardioOncol* 2021;3:619-34.

434 36. Pedersen F, Butrymovich V, Kelbæk H, Wachtell K, Helqvist S, Kastrup J, et al.  
435 Short- and long-term cause of death in patients treated with primary PCI for STEMI. *J*  
436 *Am Coll Cardiol* 2014;64:2101-8.

437 37. Spoon DB, Psaltis PJ, Singh M, Holmes DR, Jr., Gersh BJ, Rihal CS, et al.  
438 Trends in cause of death after percutaneous coronary intervention. *Circulation*  
439 2014;129:1286-94.

440 38. Hasin T, Iakobishvili Z, Weisz G. Associated Risk of Malignancy in Patients

441 with Cardiovascular Disease: Evidence and Possible Mechanism. *Am J Med*  
442 2017;130:780-5.

443 39. Selvik HA, Thomassen L, Bjerkreim AT, Næss H. Cancer-Associated Stroke:  
444 The Bergen NORSTROKE Study. *Cerebrovasc Dis Extra* 2015;5:107-13.

445 40. Suzuki M, Tomoike H, Dai Z, Hosoda T, Sumiyoshi T, Hosoda S, et al.  
446 Polyvascular Disease and the Incidence of Cancer in Patients with Coronary Artery  
447 Disease. *Jma j* 2022;5:498-509.

448 41. Dekker E, Tanis PJ, Vleugels JLA, Kasi PM, Wallace MB. Colorectal cancer.  
449 *Lancet* 2019;394:1467-80.

450 42. Yuhara H, Steinmaus C, Cohen SE, Corley DA, Tei Y, Buffler PA. Is diabetes  
451 mellitus an independent risk factor for colon cancer and rectal cancer? *Am J*  
452 *Gastroenterol* 2011;106:1911-21.

453 43. Keum N, Giovannucci E. Global burden of colorectal cancer: emerging trends,  
454 risk factors and prevention strategies. *Nat Rev Gastroenterol Hepatol* 2019;16:713-32.

455 44. Al-Shaar L, Satija A, Wang DD, Rimm EB, Smith-Warner SA, Stampfer MJ, et  
456 al. Red meat intake and risk of coronary heart disease among US men: prospective  
457 cohort study. *Bmj* 2020;371:m4141.

458 45. Willett WC, Stampfer MJ, Colditz GA, Rosner BA, Speizer FE. Relation of  
459 meat, fat, and fiber intake to the risk of colon cancer in a prospective study among

460 women. *N Engl J Med* 1990;323:1664-72.

461 46. Qiao Y, Yang T, Gan Y, Li W, Wang C, Gong Y, et al. Associations between  
462 aspirin use and the risk of cancers: a meta-analysis of observational studies. *BMC*  
463 *Cancer* 2018;18:288.

464 47. Yang YS, Kornelius E, Chiou JY, Lai YR, Lo SC, Peng CH, et al. Low-Dose  
465 Aspirin Reduces Breast Cancer Risk in Women with Diabetes: A Nationwide  
466 Retrospective Cohort Study in Taiwan. *Journal of women's health (2002)*  
467 2017;26:1278-84.

468 48. Meijers WC, Maglione M, Bakker SJL, Oberhuber R, Kieneker LM, de Jong S,  
469 et al. Heart Failure Stimulates Tumor Growth by Circulating Factors. *Circulation*  
470 2018;138:678-91.

471 49. Mirbolouk M, Kianoush S, Dardari Z, Miedema MD, Shaw LJ, Rumberger JA,  
472 et al. The association of coronary artery calcium score and mortality risk among  
473 smokers: The coronary artery calcium consortium. *Atherosclerosis* 2020;294:33-40.  
474

475 **Figure title and legends**

476

477 **Figure 1.** Flowchart for selection of articles

478 **Figure 2.** Forest plot of comparing incident cancer risk in patients with CAD with  
479 that in patients without CAD; CI, confidence interval; OR, odds ratio; se, standard  
480 error; TE, treatment effect.

481 **Figure 3.** Forest plot of comparing incident cancer risk in patients with CAD with  
482 that in patients without CAD by individual sex. CAD, coronary artery disease; CI,  
483 confidence interval; OR, odds ratio; se, standard error; TE, treatment effect.

484 **Figure 4.** Forest plot of comparing incident cancer risk in patients with CAD with  
485 that in patients without CAD by individual cancer type. CAD, coronary artery disease;  
486 CI, confidence interval; OR, odds ratio; se, standard error; TE, treatment effect.

# Association between coronary artery disease and incident cancer risk: a systematic review and meta-analysis of cohort studies

ORIGINALITY REPORT

3%

SIMILARITY INDEX

PRIMARY SOURCES

- 1** [hdl.handle.net](https://hdl.handle.net)  
Internet 26 words — 1%
- 2** Yifan Xu, Zhuang Wu, Hang Xu. "Cancer-related cryptogenic stroke involving the bilateral anterior and the posterior circulations: Diagnostic value of clinical and imaging characteristics", *Frontiers in Neurology*, 2022  
Crossref 25 words — 1%
- 3** [link.springer.com](https://link.springer.com)  
Internet 25 words — 1%
- 4** Valentina Milazzo, Nicola Cosentino, Jeness Campodonico, Claudia Lucci, Daniela Cardinale, Carlo M. Cipolla, Giancarlo Marenzi. "Characteristics, Management, and Outcomes of Acute Coronary Syndrome Patients with Cancer", *Journal of Clinical Medicine*, 2020  
Crossref 24 words — 1%
- 5** [pubmed.ncbi.nlm.nih.gov](https://pubmed.ncbi.nlm.nih.gov)  
Internet 21 words — 1%

EXCLUDE BIBLIOGRAPHY ON

EXCLUDE MATCHES

< 5 WORDS
