# Supplementary material for: Association between coronary artery disease and incident cancer risk: a systematic review and meta-analysis of cohort studies
Source: PeerJ journal article supplement (doi:10.7717/peerj.14922), 2023-02-23
Supplement: Supplementary_file.pdf [file Supplementary_file.pdf]

## Supplementary File

### **Association between coronary artery disease and incident cancer risk: a systematic review and meta-analysis of cohort studies**

#### **Supplementary Tables and Figures**

**Supplemental Table S1.** Search strategy

**Supplemental Tables S2.** Newcastle-Ottawa scale for assessment of quality of included studies – Cohort studies

**Supplemental Figure S1.** Forest plot of incident cancer risk, comparing participants with CAD as those without CAD, with subgroup analysis by country.

**Supplemental Figure S2.** Forest plot of incident cancer risk, comparing participants with CAD as those without CAD, with subgroup analysis by CAD type.

**Supplemental Figure S3.** Forest plot of incident cancer risk, comparing participants with CAD as those without CAD by individual cancer type

**Supplemental Figure S4.** Forest plot of incident cancer risk with follow-up time more than one year, comparing participants with CAD as those without CAD.

**Supplemental Figure S5.** The Funnel plot of the standard error by odds ratio of the studies included in the meta-analysis.

**Table S1.** Search strategy

Search strategy in Pubmed

|    |                                                                                                                                                                                                                                                                                                                                                                                                                                                                                                                                                                                                                                                                                                                                                                                                                                                                                                                                   |
|----|-----------------------------------------------------------------------------------------------------------------------------------------------------------------------------------------------------------------------------------------------------------------------------------------------------------------------------------------------------------------------------------------------------------------------------------------------------------------------------------------------------------------------------------------------------------------------------------------------------------------------------------------------------------------------------------------------------------------------------------------------------------------------------------------------------------------------------------------------------------------------------------------------------------------------------------|
| #1 | ("Coronary Disease"[MeSH Terms] OR coronary heart[Title] OR Coronary Thrombosis[MeSH Terms] OR (Coronary[Title] AND ("thrombosis"[Title] OR "Thromboses"[Title])) OR coronary artery[Title] OR "CAD"[Title] OR coronary atherosclerotic heart disease[Title] OR "CAHD"[Title] OR "arteriosclerosis"[MeSH Terms] OR "arterioscleros*" [Title] OR "atherosclerosis"[MeSH Terms] OR "Atherogenesis"[Title] OR ("atherosclerosis"[Title] OR "atheroscleroses"[Title]) OR Myocardial Infarction[MeSH Terms] OR "Anterior Wall Myocardial Infarction"[MeSH Terms] OR "Myocardial Ischemia"[MeSH Terms] OR (( "Heart"[Title] OR "cardiac"[Title] OR "myocardium"[Title] OR "myocardial"[Title] OR syndrome[ti]))                                                                                                                                                                                                                         |
| #2 | ("Neoplasms"[MeSH Terms] OR ("Neoplasms"[Title/Abstract] OR (( "neoplasm"[Title/Abstract]) OR "Neoplasia"[Title/Abstract]) OR "Neoplasias"[Title/Abstract] OR "Tumors"[Title/Abstract] OR "Tumor"[Title/Abstract] OR "Cancer"[Title/Abstract] OR "Cancers"[Title/Abstract] OR "Malignancy"[Title/Abstract] OR "Malignancies"[Title/Abstract] OR "malignant neoplasm*" [Title/Abstract] OR "malignant cancer"[Title/Abstract] OR "malignant tumors"[Title/Abstract] OR "Hamartoma"[MeSH Terms] OR "Leukemia"[MeSH Terms] OR "Lymphoma"[MeSH Terms] OR "Carcinoma"[MeSH Terms] OR "Adenocarcinoma"[MeSH Terms] OR "sarcoma"[MeSH Terms] OR "Hamartoma"[Title/Abstract] OR "Leukemia"[Title/Abstract] OR "Lymphoma"[Title/Abstract] OR "Carcinoma"[Title/Abstract] OR "Adenocarcinoma"[Title/Abstract] OR "sarcoma"[Title/Abstract]))                                                                                                |
| #3 | ("Cohort Studies"[MeSH Terms] OR ("Cohort"[Title/Abstract] OR "incidence studies"[Title/Abstract] OR "incidence study"[Title/Abstract]) OR "Cohort Effect"[MeSH Terms] OR ("cohort effect*" [Title/Abstract] OR "generation effect*" [Title/Abstract]) OR "Follow-Up Studies"[MeSH Terms] OR ("follow up"[Title/Abstract] OR "Followup"[Title/Abstract] OR "follow up"[Title/Abstract]) OR "Longitudinal Studies"[MeSH Terms] OR "Longitudinal"[Title/Abstract] OR "Prospective Studies"[MeSH Terms] OR "prospective"[Title/Abstract] OR "Retrospective Studies"[MeSH Terms] OR "retrospect*" [Title/Abstract] OR "Observational Study"[Publication Type] OR "Observational Studies as Topic"[MeSH Terms] OR "Epidemiologic Studies"[MeSH Terms] OR "Case-Control Studies"[MeSH Terms] OR ("Case-Control"[Title/Abstract] OR "Case-Comparison"[Title/Abstract] OR "Case-Compeer"[Title/Abstract] OR "Case-Base"[Title/Abstract])) |
| #4 | #1 AND #2 AND #3                                                                                                                                                                                                                                                                                                                                                                                                                                                                                                                                                                                                                                                                                                                                                                                                                                                                                                                  |

|               |                                                                                                                                                                                                                                                                                                                                                                                                                                                                                                                                                                                                                                                                                                                                                                                                                                                                                                                                                                                                                                                                                                                                                                                                                                                                                                                                                                                                                                                                                                                                                                                                                                                                                                                                                                                                                                                                                                                                                                                                                                                                                                                                                                                                                                                                                                                                                                                                                                                                                                                                                                                                                                                                                                                                                   |
|---------------|---------------------------------------------------------------------------------------------------------------------------------------------------------------------------------------------------------------------------------------------------------------------------------------------------------------------------------------------------------------------------------------------------------------------------------------------------------------------------------------------------------------------------------------------------------------------------------------------------------------------------------------------------------------------------------------------------------------------------------------------------------------------------------------------------------------------------------------------------------------------------------------------------------------------------------------------------------------------------------------------------------------------------------------------------------------------------------------------------------------------------------------------------------------------------------------------------------------------------------------------------------------------------------------------------------------------------------------------------------------------------------------------------------------------------------------------------------------------------------------------------------------------------------------------------------------------------------------------------------------------------------------------------------------------------------------------------------------------------------------------------------------------------------------------------------------------------------------------------------------------------------------------------------------------------------------------------------------------------------------------------------------------------------------------------------------------------------------------------------------------------------------------------------------------------------------------------------------------------------------------------------------------------------------------------------------------------------------------------------------------------------------------------------------------------------------------------------------------------------------------------------------------------------------------------------------------------------------------------------------------------------------------------------------------------------------------------------------------------------------------------|
| search detail | <p> ("Coronary Disease"[MeSH Terms] OR coronary heart[Title] OR Coronary Thrombosis[MeSH Terms] OR (Coronary[Title] AND ("thrombosis"[Title] OR "Thromboses"[Title])) OR coronary artery[Title] OR "CAD"[Title] OR coronary atherosclerotic heart disease[Title] OR "CAHD"[Title] OR "arteriosclerosis"[MeSH Terms] OR "arterioscleros*"[Title] OR "atherosclerosis"[MeSH Terms] OR "Atherogenesis"[Title] OR ("atherosclerosis"[Title] OR "atheroscleroses"[Title]) OR Myocardial Infarction[MeSH Terms] OR "Anterior Wall Myocardial Infarction"[MeSH Terms] OR "Myocardial Ischemia"[MeSH Terms] OR (("Heart"[Title] OR "cardiac"[Title] OR "myocardium"[Title] OR "myocardial"[Title] OR syndrome[ti]) AND ("infarct"[Title] OR "infarction"[Title] OR "attack"[Title] OR "ischemia"[Title] OR "ischemic"[Title] OR ischaemic[ti] OR "atherosclero*"[Title])) OR ("Coronary"[Title] AND ("thrombosis"[Title] OR "Thromboses"[Title] OR "atherosclero*"[Title]))) AND ("Neoplasms"[MeSH Terms] OR ("Neoplasms"[Title/Abstract] OR ( "neoplasm"[Title/Abstract]) OR "Neoplasia"[Title/Abstract]) OR "Neoplasias"[Title/Abstract] OR "Tumors"[Title/Abstract] OR "Tumor"[Title/Abstract] OR "Cancer"[Title/Abstract] OR "Cancers"[Title/Abstract] OR "Malignancy"[Title/Abstract] OR "Malignancies"[Title/Abstract] OR "malignant neoplasm*"[Title/Abstract] OR "malignant cancer"[Title/Abstract] OR "malignant tumors"[Title/Abstract] OR "Hamartoma"[MeSH Terms] OR "Leukemia"[MeSH Terms] OR "Lymphoma"[MeSH Terms] OR "Carcinoma"[MeSH Terms] OR "Adenocarcinoma"[MeSH Terms] OR "sarcoma"[MeSH Terms] OR "Hamartoma"[Title/Abstract] OR "Leukemia"[Title/Abstract] OR "Lymphoma"[Title/Abstract] OR "Carcinoma"[Title/Abstract] OR "Adenocarcinoma"[Title/Abstract] OR "sarcoma"[Title/Abstract])) AND ("Cohort Studies"[MeSH Terms] OR ("Cohort"[Title/Abstract] OR "incidence studies"[Title/Abstract] OR "incidence study"[Title/Abstract]) OR "Cohort Effect"[MeSH Terms] OR ("cohort effect*"[Title/Abstract] OR "generation effect*"[Title/Abstract]) OR "Follow-Up Studies"[MeSH Terms] OR ("follow up"[Title/Abstract] OR "Followup"[Title/Abstract] OR "follow up"[Title/Abstract]) OR "Longitudinal Studies"[MeSH Terms] OR "Longitudinal"[Title/Abstract] OR "Prospective Studies"[MeSH Terms] OR "prospective"[Title/Abstract] OR "Retrospective Studies"[MeSH Terms] OR "retrospect*"[Title/Abstract] OR "Observational Study"[Publication Type] OR "Observational Studies as Topic"[MeSH Terms] OR "Epidemiologic Studies"[MeSH Terms] OR "Case-Control Studies"[MeSH Terms] OR ("Case-Control"[Title/Abstract] OR "Case-Comparison"[Title/Abstract] OR "Case-Compeer"[Title/Abstract] OR "Case-Base"[Title/Abstract])) </p> |
|---------------|---------------------------------------------------------------------------------------------------------------------------------------------------------------------------------------------------------------------------------------------------------------------------------------------------------------------------------------------------------------------------------------------------------------------------------------------------------------------------------------------------------------------------------------------------------------------------------------------------------------------------------------------------------------------------------------------------------------------------------------------------------------------------------------------------------------------------------------------------------------------------------------------------------------------------------------------------------------------------------------------------------------------------------------------------------------------------------------------------------------------------------------------------------------------------------------------------------------------------------------------------------------------------------------------------------------------------------------------------------------------------------------------------------------------------------------------------------------------------------------------------------------------------------------------------------------------------------------------------------------------------------------------------------------------------------------------------------------------------------------------------------------------------------------------------------------------------------------------------------------------------------------------------------------------------------------------------------------------------------------------------------------------------------------------------------------------------------------------------------------------------------------------------------------------------------------------------------------------------------------------------------------------------------------------------------------------------------------------------------------------------------------------------------------------------------------------------------------------------------------------------------------------------------------------------------------------------------------------------------------------------------------------------------------------------------------------------------------------------------------------------|

Search strategy in Embase

| No. | Query                                                     |
|-----|-----------------------------------------------------------|
| #71 | #70 AND [embase]/lim NOT ([embase]/lim AND [medline]/lim) |

|     |                                                                                                                                                                                                                                                                   |
|-----|-------------------------------------------------------------------------------------------------------------------------------------------------------------------------------------------------------------------------------------------------------------------|
| #70 | #68 NOT #69                                                                                                                                                                                                                                                       |
| #69 | #68 AND ('chapter'/it OR 'conference abstract'/it OR 'editorial'/it OR 'erratum'/it OR 'letter'/it OR 'note'/it OR 'tombstone'/it)                                                                                                                                |
| #68 | #46 AND #56 AND #67                                                                                                                                                                                                                                               |
| #67 | #57 OR #58 OR #59 OR #60 OR #61 OR #62 OR #63 OR #64 OR #65 OR #66                                                                                                                                                                                                |
| #66 | 'incidence'/exp OR 'incidence':ti,ab OR 'incidence rate':ti,ab OR 'rate, incidence':ti,ab                                                                                                                                                                         |
| #65 | 'cohort effect'/exp OR 'cohort effect':ti,ab                                                                                                                                                                                                                      |
| #64 | 'observational study'/exp OR 'observation studies':ti,ab OR 'observation study':ti,ab OR 'observational studies':ti,ab OR 'observational study':ti,ab                                                                                                             |
| #63 | 'retrospective study'/exp OR 'retrospective design':ti,ab OR 'retrospective study':ti,ab OR 'retrospective studies':ti,ab                                                                                                                                         |
| #62 | 'prospective study'/exp OR 'prospective method':ti,ab OR 'prospective studies':ti,ab OR 'prospective study':ti,ab OR 'study, prospective':ti,ab                                                                                                                   |
| #61 | 'longitudinal study'/exp OR 'longitudinal evaluation':ti,ab OR 'longitudinal studies':ti,ab OR 'longitudinal study':ti,ab                                                                                                                                         |
| #60 | 'follow up'/exp OR 'follow up':ti,ab OR 'follow up study':ti,ab OR 'follow-up studies':ti,ab OR 'followup':ti,ab OR 'lost to follow up':ti,ab OR 'lost to follow-up':ti,ab                                                                                        |
| #59 | 'cohort analysis'/exp OR 'analysis, cohort':ti,ab OR 'cohort analysis':ti,ab OR 'cohort life cycle':ti,ab OR 'cohort studies':ti,ab OR 'cohort study':ti,ab                                                                                                       |
| #58 | 'case control study'/exp OR 'case control study':ti,ab OR 'case-control studies':ti,ab OR 'case-control study':ti,ab OR 'control study, case':ti,ab OR 'matched case control':ti,ab OR 'matched case control studies':ti,ab OR 'matched case control study':ti,ab |
| #57 | 'epidemiology'/exp/mj OR 'epidemiologic studies':ti,ab OR 'epidemiologic research':ti,ab OR 'epidemiology':ti,ab                                                                                                                                                  |
| #56 | #47 OR #48 OR #49 OR #50 OR #51 OR #52 OR #53 OR #54 OR #55                                                                                                                                                                                                       |
| #55 | 'liver cell carcinoma'/exp OR 'hepatocarcinoma':ti OR 'hepatoma':ti                                                                                                                                                                                               |

|     |                                                                                                                                                                                                                                                                                                                                                                                                                                                                                                                                                                                                                                                                                                                                                                                                                                             |
|-----|---------------------------------------------------------------------------------------------------------------------------------------------------------------------------------------------------------------------------------------------------------------------------------------------------------------------------------------------------------------------------------------------------------------------------------------------------------------------------------------------------------------------------------------------------------------------------------------------------------------------------------------------------------------------------------------------------------------------------------------------------------------------------------------------------------------------------------------------|
| #54 | 'leukemia'/exp OR 'aleukaemia':ti OR 'aleukemia':ti OR 'leucaemia':ti OR 'leucemia':ti OR 'leukaemia':ti OR 'leukemia':ti                                                                                                                                                                                                                                                                                                                                                                                                                                                                                                                                                                                                                                                                                                                   |
| #53 | 'adenocarcinoma'/exp OR 'adenocancer':ti OR 'adenocarcinoma':ti                                                                                                                                                                                                                                                                                                                                                                                                                                                                                                                                                                                                                                                                                                                                                                             |
| #52 | 'carcinoma'/exp OR 'carcinoma':ti                                                                                                                                                                                                                                                                                                                                                                                                                                                                                                                                                                                                                                                                                                                                                                                                           |
| #51 | 'sarcoma'/exp OR 'histioblastoma':ti OR 'histiosarcoma':ti OR 'sarcoma':ti                                                                                                                                                                                                                                                                                                                                                                                                                                                                                                                                                                                                                                                                                                                                                                  |
| #50 | 'lymphoma'/exp OR 'adenolymphoma':ti OR 'cystadenoma lymphomatosum':ti OR 'lymphoma':ti OR 'lymphomas':ti                                                                                                                                                                                                                                                                                                                                                                                                                                                                                                                                                                                                                                                                                                                                   |
| #49 | malignancy:ti OR malignancies:ti                                                                                                                                                                                                                                                                                                                                                                                                                                                                                                                                                                                                                                                                                                                                                                                                            |
| #48 | 'malignant neoplasm'/exp OR 'cancer':ti OR 'cancers':ti OR 'malignant neoplasia':ti                                                                                                                                                                                                                                                                                                                                                                                                                                                                                                                                                                                                                                                                                                                                                         |
| #47 | 'neoplasm'/exp OR 'neoplasia':ti OR 'neoplasm':ti OR 'neoplasms':ti OR 'neoplastic':ti OR 'tumor':ti OR tumours:ti OR 'tumour':ti                                                                                                                                                                                                                                                                                                                                                                                                                                                                                                                                                                                                                                                                                                           |
| #46 | #39 OR #40 OR #41 OR #42 OR #43 OR #44 OR #45                                                                                                                                                                                                                                                                                                                                                                                                                                                                                                                                                                                                                                                                                                                                                                                               |
| #45 | 'heart muscle ischemia'/exp OR 'acute heart muscle ischaemia':ti OR 'acute heart muscle ischemia':ti OR 'cardiac ischaemia':ti OR 'cardiac ischemia':ti OR 'cardiac muscle ischaemia':ti OR 'cardiac muscle ischemia':ti OR 'coronary artery ischaemia':ti OR 'coronary artery ischemia':ti OR 'coronary ischaemia':ti OR 'coronary ischemia':ti OR 'coronary syndrome':ti OR 'heart ischaemia':ti OR 'heart ischaemic arrest':ti OR 'heart ischaemic attack':ti OR 'heart ischemia':ti OR 'heart ischemic arrest':ti OR 'heart ischemic attack':ti OR 'heart muscle ischaemia':ti OR 'ischaemic heart':ti OR 'ischaemic heart arrest':ti OR 'ischaemic myocardium':ti OR 'ischemic heart':ti OR 'ischemic myocardium':ti OR 'myocardial ischaemia':ti OR 'myocardial ischemia':ti OR 'myocardium ischaemia':ti OR 'myocardium ischemia':ti |
| #44 | 'heart infarction'/exp OR 'cardiac infarct':ti OR 'cardiac infarction':ti OR 'cardial infarct':ti OR 'heart attack':ti OR 'heart infarct':ti OR 'heart infarction':ti OR 'myocardial infarction':ti OR 'myocardial infarct':ti OR 'myocardium infarct':ti OR 'myocardium infarction':ti OR 'acute heart infarction'/exp OR 'acute cardiac infarction':ti OR 'acute heart infarction':ti OR 'acute myocardial infarction':ti OR 'heart infarction, acute':ti                                                                                                                                                                                                                                                                                                                                                                                 |

|     |                                                                                                                                                                                                                                                                                                                                                                                                                                                                                                                                                                                                                                                                                                                                                                                                                                              |
|-----|----------------------------------------------------------------------------------------------------------------------------------------------------------------------------------------------------------------------------------------------------------------------------------------------------------------------------------------------------------------------------------------------------------------------------------------------------------------------------------------------------------------------------------------------------------------------------------------------------------------------------------------------------------------------------------------------------------------------------------------------------------------------------------------------------------------------------------------------|
| #43 | 'arteriosclerosis'/exp OR 'arterial sclerosis':ti OR 'arterio-sclerosis':ti OR 'arteriosclerosis':ti OR 'arteriosclerotic disease':ti OR 'arteriosclerotic disorder':ti OR 'arteriosclerotic vascular disease':ti OR 'arteriosclerotic vascular disorder':ti OR 'vascular sclerosis':ti OR 'arteriolosclerosis'/exp OR 'arteriolar sclerosis':ti OR 'arteriolo-sclerosis':ti OR 'arteriolosclerosis':ti OR 'arteriolosclerotic disease':ti OR 'arteriolosclerotic small vessel disease':ti OR 'arteriolosis':ti OR 'atherosclerosis'/exp OR 'atherosclerotic disease':ti OR 'athero-sclerosis':ti OR 'atheromatous sclerosis':ti OR 'atherosclerosis':ti OR 'atherosclerosis grading':ti OR 'atherosclerotic disease':ti OR 'atherosclerotic disorder':ti OR 'atherosclerotic vascular disease':ti OR 'atherosclerotic vascular disorder':ti |
| #42 | 'coronary artery thrombosis'/exp OR 'acute coronary artery thrombosis':ti OR 'arterial thrombosis, coronary':ti OR 'coronary arterial thrombosis':ti OR 'coronary artery thrombosis':ti OR 'coronary thrombosis':ti OR 'thrombosis, coronary artery':ti                                                                                                                                                                                                                                                                                                                                                                                                                                                                                                                                                                                      |
| #41 | 'ischemic heart disease'/exp OR 'heart disease, coronary':ti OR 'heart disease, ischaemic':ti OR 'heart disease, ischemic':ti OR 'ischaemia heart disease':ti OR 'ischaemic cardiac disease':ti OR 'ischaemic cardial disease':ti OR 'ischaemic heart disease':ti OR 'ischemia heart disease':ti OR 'ischemic cardiac disease':ti OR 'ischemic cardial disease':ti OR 'ischemic cardiopathy':ti OR 'ischemic heart disease':ti                                                                                                                                                                                                                                                                                                                                                                                                               |
| #40 | cad:ti,ab OR cahd:ti,ab                                                                                                                                                                                                                                                                                                                                                                                                                                                                                                                                                                                                                                                                                                                                                                                                                      |
| #39 | 'coronary artery disease'/exp OR 'coronary artery disease':ti OR 'coronary disease':ti OR 'multivessel coronary artery disease':ti                                                                                                                                                                                                                                                                                                                                                                                                                                                                                                                                                                                                                                                                                                           |
| #38 | #8 AND #18 AND #37                                                                                                                                                                                                                                                                                                                                                                                                                                                                                                                                                                                                                                                                                                                                                                                                                           |
| #37 | #27 OR #28 OR #29 OR #30 OR #31 OR #32 OR #33 OR #34 OR #35 OR #36                                                                                                                                                                                                                                                                                                                                                                                                                                                                                                                                                                                                                                                                                                                                                                           |
| #36 | 'incidence'/exp OR 'incidence':ti,ab OR 'incidence rate':ti,ab OR 'rate, incidence':ti,ab                                                                                                                                                                                                                                                                                                                                                                                                                                                                                                                                                                                                                                                                                                                                                    |
| #35 | 'cohort effect'/exp OR 'cohort effect':ti,ab                                                                                                                                                                                                                                                                                                                                                                                                                                                                                                                                                                                                                                                                                                                                                                                                 |
| #34 | 'observational study'/exp OR 'observation studies':ti,ab OR 'observation study':ti,ab OR 'observational studies':ti,ab OR 'observational study':ti,ab                                                                                                                                                                                                                                                                                                                                                                                                                                                                                                                                                                                                                                                                                        |
| #33 | 'retrospective study'/exp OR 'retrospective design':ti,ab OR 'retrospective study':ti,ab OR 'retrospective studies':ti,ab                                                                                                                                                                                                                                                                                                                                                                                                                                                                                                                                                                                                                                                                                                                    |
| #32 | 'prospective study'/exp OR 'prospective method':ti,ab OR 'prospective studies':ti,ab OR 'prospective study':ti,ab OR 'study, prospective':ti,ab                                                                                                                                                                                                                                                                                                                                                                                                                                                                                                                                                                                                                                                                                              |
| #31 | 'longitudinal study'/exp OR 'longitudinal evaluation':ti,ab OR 'longitudinal studies':ti,ab OR 'longitudinal study':ti,ab                                                                                                                                                                                                                                                                                                                                                                                                                                                                                                                                                                                                                                                                                                                    |

|     |                                                                                                                                                                                                                                                                   |
|-----|-------------------------------------------------------------------------------------------------------------------------------------------------------------------------------------------------------------------------------------------------------------------|
| #30 | 'follow up'/exp OR 'follow up':ti,ab OR 'follow up study':ti,ab OR 'follow-up studies':ti,ab OR 'followup':ti,ab OR 'lost to follow up':ti,ab OR 'lost to follow-up':ti,ab                                                                                        |
| #29 | 'cohort analysis'/exp OR 'analysis, cohort':ti,ab OR 'cohort analysis':ti,ab OR 'cohort life cycle':ti,ab OR 'cohort studies':ti,ab OR 'cohort study':ti,ab                                                                                                       |
| #28 | 'case control study'/exp OR 'case control study':ti,ab OR 'case-control studies':ti,ab OR 'case-control study':ti,ab OR 'control study, case':ti,ab OR 'matched case control':ti,ab OR 'matched case control studies':ti,ab OR 'matched case control study':ti,ab |
| #27 | 'epidemiology'/exp/mj OR 'epidemiologic studies':ti,ab OR 'epidemiologic research':ti,ab OR 'epidemiology':ti,ab                                                                                                                                                  |
| #26 | 'observational study'/exp                                                                                                                                                                                                                                         |
| #25 | 'retrospective study'/exp                                                                                                                                                                                                                                         |
| #24 | 'prospective study'/exp                                                                                                                                                                                                                                           |
| #23 | 'longitudinal study'/exp                                                                                                                                                                                                                                          |
| #22 | 'evaluation and follow up'/exp                                                                                                                                                                                                                                    |
| #21 | 'attack rate'/exp OR 'cancer incidence'/exp                                                                                                                                                                                                                       |
| #20 | 'cohort effect'/exp                                                                                                                                                                                                                                               |
| #19 | 'cohort analysis'/exp                                                                                                                                                                                                                                             |
| #18 | #9 OR #10 OR #11 OR #12 OR #13 OR #14 OR #15 OR #16 OR #17                                                                                                                                                                                                        |
| #17 | 'liver cell carcinoma'/exp OR 'hepatocarcinoma':ti OR 'hepatoma':ti                                                                                                                                                                                               |
| #16 | 'leukemia'/exp OR 'aleukaemia':ti OR 'aleukemia':ti OR 'leucaemia':ti OR 'leucemia':ti OR 'leukaemia':ti OR 'leukemia':ti                                                                                                                                         |
| #15 | 'adenocarcinoma'/exp OR 'adenocancer':ti OR 'adenocarcinoma':ti                                                                                                                                                                                                   |

|     |                                                                                                                                                                                                                                                                                                                                                                                                                                                                                                                                                                                                                                                                                                                                                                                                                                              |
|-----|----------------------------------------------------------------------------------------------------------------------------------------------------------------------------------------------------------------------------------------------------------------------------------------------------------------------------------------------------------------------------------------------------------------------------------------------------------------------------------------------------------------------------------------------------------------------------------------------------------------------------------------------------------------------------------------------------------------------------------------------------------------------------------------------------------------------------------------------|
| #14 | 'carcinoma'/exp OR 'carcinoma':ti                                                                                                                                                                                                                                                                                                                                                                                                                                                                                                                                                                                                                                                                                                                                                                                                            |
| #13 | 'sarcoma'/exp OR 'histioblastoma':ti OR 'histiosarcoma':ti OR 'sarcoma':ti                                                                                                                                                                                                                                                                                                                                                                                                                                                                                                                                                                                                                                                                                                                                                                   |
| #12 | 'lymphoma'/exp OR 'adenolymphoma':ti OR 'cystadenoma lymphomatosum':ti OR 'lymphoma':ti OR 'lymphomas':ti                                                                                                                                                                                                                                                                                                                                                                                                                                                                                                                                                                                                                                                                                                                                    |
| #11 | malignancy:ti OR malignancies:ti                                                                                                                                                                                                                                                                                                                                                                                                                                                                                                                                                                                                                                                                                                                                                                                                             |
| #10 | 'malignant neoplasm'/exp OR 'cancer':ti OR 'cancers':ti OR 'malignant neoplasia':ti                                                                                                                                                                                                                                                                                                                                                                                                                                                                                                                                                                                                                                                                                                                                                          |
| #9  | 'neoplasm'/exp OR 'neoplasia':ti OR 'neoplasm':ti OR 'neoplasms':ti OR 'neoplastic':ti OR 'tumor':ti OR tumours:ti OR 'tumour':ti                                                                                                                                                                                                                                                                                                                                                                                                                                                                                                                                                                                                                                                                                                            |
| #8  | #1 OR #2 OR #3 OR #4 OR #5 OR #6 OR #7                                                                                                                                                                                                                                                                                                                                                                                                                                                                                                                                                                                                                                                                                                                                                                                                       |
| #7  | 'heart muscle ischemia'/exp OR 'acute heart muscle ischaemia':ti OR 'acute heart muscle ischemia':ti OR 'cardiac ischaemia':ti OR 'cardiac ischemia':ti OR 'cardiac muscle ischaemia':ti OR 'cardiac muscle ischemia':ti OR 'coronary artery ischaemia':ti OR 'coronary artery ischemia':ti OR 'coronary ischaemia':ti OR 'coronary ischemia':ti OR 'coronary syndrome':ti OR 'heart ischaemia':ti OR 'heart ischaemic arrest':ti OR 'heart ischaemic attack':ti OR 'heart ischemia':ti OR 'heart ischemic arrest':ti OR 'heart ischemic attack':ti OR 'heart muscle ischaemia':ti OR 'ischaemic heart':ti OR 'ischaemic heart arrest':ti OR 'ischaemic myocardium':ti OR 'ischemic heart':ti OR 'ischemic myocardium':ti OR 'myocardial ischaemia':ti OR 'myocardial ischemia':ti OR 'myocardium ischaemia':ti OR 'myocardium ischemia':ti  |
| #6  | 'heart infarction'/exp OR 'cardiac infarct':ti OR 'cardiac infarction':ti OR 'cardial infarct':ti OR 'heart attack':ti OR 'heart infarct':ti OR 'heart infarction':ti OR 'myocardial infarction':ti OR 'myocardial infarct':ti OR 'myocardium infarct':ti OR 'myocardium infarction':ti OR 'acute heart infarction'/exp OR 'acute cardiac infarction':ti OR 'acute heart infarction':ti OR 'acute myocardial infarction':ti OR 'heart infarction, acute':ti                                                                                                                                                                                                                                                                                                                                                                                  |
| #5  | 'arteriosclerosis'/exp OR 'arterial sclerosis':ti OR 'arterio-sclerosis':ti OR 'arteriosclerosis':ti OR 'arteriosclerotic disease':ti OR 'arteriosclerotic disorder':ti OR 'arteriosclerotic vascular disease':ti OR 'arteriosclerotic vascular disorder':ti OR 'vascular sclerosis':ti OR 'arteriolosclerosis'/exp OR 'arteriolar sclerosis':ti OR 'arteriolo-sclerosis':ti OR 'arteriolosclerosis':ti OR 'arteriolosclerotic disease':ti OR 'arteriolosclerotic small vessel disease':ti OR 'arteriolosis':ti OR 'atherosclerosis'/exp OR 'atherosclerotic disease':ti OR 'athero-sclerosis':ti OR 'atheromatous sclerosis':ti OR 'atherosclerosis':ti OR 'atherosclerosis grading':ti OR 'atherosclerotic disease':ti OR 'atherosclerotic disorder':ti OR 'atherosclerotic vascular disease':ti OR 'atherosclerotic vascular disorder':ti |



|    |                                                                                                                                                                                                                                                                                                                                                                                                                                |
|----|--------------------------------------------------------------------------------------------------------------------------------------------------------------------------------------------------------------------------------------------------------------------------------------------------------------------------------------------------------------------------------------------------------------------------------|
| #4 | 'coronary artery thrombosis'/exp OR 'acute coronary artery thrombosis':ti OR 'arterial thrombosis, coronary':ti OR 'coronary arterial thrombosis':ti OR 'coronary artery thrombosis':ti OR 'coronary thrombosis':ti OR 'thrombosis, coronary artery':ti                                                                                                                                                                        |
| #3 | 'ischemic heart disease'/exp OR 'heart disease, coronary':ti OR 'heart disease, ischaemic':ti OR 'heart disease, ischemic':ti OR 'ischaemia heart disease':ti OR 'ischaemic cardiac disease':ti OR 'ischaemic cardial disease':ti OR 'ischaemic heart disease':ti OR 'ischemia heart disease':ti OR 'ischemic cardiac disease':ti OR 'ischemic cardial disease':ti OR 'ischemic cardiopathy':ti OR 'ischemic heart disease':ti |
| #2 | cad:ti,ab OR cahd:ti,ab                                                                                                                                                                                                                                                                                                                                                                                                        |
| #1 | 'coronary artery disease'/exp OR 'coronary artery disease':ti OR 'coronary disease':ti OR 'multivessel coronary artery disease':ti                                                                                                                                                                                                                                                                                             |

#### Search strategy in Cochrane Library

| ID | Search                                                                                    |
|----|-------------------------------------------------------------------------------------------|
| #1 | MeSH descriptor: [Coronary Disease] explode all trees+B22B1B7:B21                         |
| #2 | MeSH descriptor: [Coronary Thrombosis] explode all trees                                  |
| #3 | MeSH descriptor: [Coronary Artery Disease] explode all trees                              |
| #4 | (coronary AND (thrombosis OR Thromboses OR Arterioscler* OR artery OR heart)):ti          |
| #5 | MeSH descriptor: [Arteriosclerosis] explode all trees                                     |
| v6 | MeSH descriptor: [Atherosclerosis] explode all trees                                      |
| #7 | (Arterioscleros* OR Atherogenesis OR atheroscleros* OR atherosclerotic OR CAD OR CAHD):ti |
| #8 | MeSH descriptor: [Myocardial Infarction] explode all trees                                |
| #9 | MeSH descriptor: [Myocardial Ischemia] explode all trees                                  |

|     |                                                                                                                                                |
|-----|------------------------------------------------------------------------------------------------------------------------------------------------|
| #10 | MeSH descriptor: [Anterior Wall Myocardial Infarction] explode all trees                                                                       |
| #11 | ((heart OR cardiac OR myocardium OR myocardial OR syndrome) AND (infarct* OR attack OR ischemia OR ischemic OR ischaemi* OR atherosclero*)):ti |
| #12 | #1 OR #2 OR #3 OR #4 OR #5 OR #6 OR #7 OR #8 OR #9 OR #10 OR #11                                                                               |
| #13 | MeSH descriptor: [Neoplasms] explode all trees                                                                                                 |
| #14 | MeSH descriptor: [Sarcoma] explode all trees                                                                                                   |
| #15 | MeSH descriptor: [Lymphoma] explode all trees                                                                                                  |

Search strategy in Airiti library

| ID | Search                                             |
|----|----------------------------------------------------|
| #1 | [ALL3]:(冠心 OR 梗塞 OR 缺血 OR 心肌) AND [ALL3]:(癌 OR 腫瘤) |

**Tables S2.** Newcastle-Ottawa scale for assessment of quality of included studies – Cohort studies  
(each star represents if individual criterion within the subsection was fulfilled)

| Study                       | Selection                                                                                  |                                                 |                                      |                                                                          | Comparability                              |                                   | Outcome                                      |                    |                                                                                                 | Total quality score |
|-----------------------------|--------------------------------------------------------------------------------------------|-------------------------------------------------|--------------------------------------|--------------------------------------------------------------------------|--------------------------------------------|-----------------------------------|----------------------------------------------|--------------------|-------------------------------------------------------------------------------------------------|---------------------|
| Quality assessment criteria | Representativeness of exposed cohort                                                       | Selection of non-exposed cohort                 | Ascertainment of exposure            | Demonstration that outcome of interest was not present at start of study | Adjust for the most important risk factors | Adjust for other risk factors     | Assessment of outcome                        | Follow-up length   | Loss to follow-up rate                                                                          |                     |
| Acceptable (★)              | Representative of general adult population in community (age/sex/being at risk of disease) | Drawn from the same community as exposed cohort | Secure records, Structured interview | Yes, or excluded when analysis                                           | Yes, at least for age and sex              | Yes, and smoking must be included | Independent blind assessment, record linkage | Follow-up >1 years | Follow-up completed, or small subjects lost(<20%), or lost subjects unlikely to introduce bias* |                     |
| Rinde, 2017                 | ★                                                                                          | ★                                               | ★                                    | ★                                                                        | ★                                          | ★                                 | ★                                            | ★                  | ★                                                                                               | 9                   |
| Dreyer, 1998                | ★                                                                                          | ★                                               | ★                                    | -                                                                        | -                                          | -                                 | ★                                            | ★                  | -                                                                                               | 5                   |

|                    |   |   |   |   |   |   |   |   |   |   |
|--------------------|---|---|---|---|---|---|---|---|---|---|
| Malmburg,<br>2018  | ★ | ★ | ★ | ★ | ★ | ★ | ★ | ★ | ★ | 9 |
| Perhsson,<br>2005  | ★ | ★ | ★ | - | ★ | - | ★ | ★ | - | 6 |
| Thomas II,<br>2012 | ★ | ★ | ★ | ★ | ★ | ★ | ★ | ★ | ★ | 9 |
| Suzuki,<br>2017    | ★ | ★ | ★ | ★ | ★ | ★ | ★ | ★ | ★ | 9 |
| Dzaye,<br>2021     | ★ | ★ | ★ | ★ | ★ | ★ | ★ | ★ | ★ | 9 |
| Berton ,<br>2018   | ★ | ★ | ★ | ★ | - | - | ★ | ★ | - | 6 |
| Erichsen,<br>2013  | ★ | ★ | ★ | ★ | ★ | ★ | ★ | ★ | ★ | 9 |
| Kwa,<br>2020       | ★ | ★ | ★ | ★ | ★ | ★ | ★ | ★ | ★ | 9 |
| Handy,<br>2016     | ★ | ★ | ★ | ★ | ★ | ★ | ★ | ★ | ★ | 9 |
| Peng, 2020         | ★ | ★ | ★ | - | ★ | ★ | ★ | ★ | - | 7 |
| Vinter,<br>2018    | ★ | ★ | ★ | ★ | ★ | ★ | ★ | ★ | ★ | 9 |
| Mirbolouk,<br>2020 | ★ | ★ | ★ | - | ★ | ★ | ★ | ★ | ★ | 8 |

**Figure S1. Forest plot of incident cancer risk, comparing participants with CAD as those without CAD, with subgroup analysis by country. CAD, coronary artery disease; CI, confidence interval; OR, odds ratio; se, standard error; TE, treatment effect.**

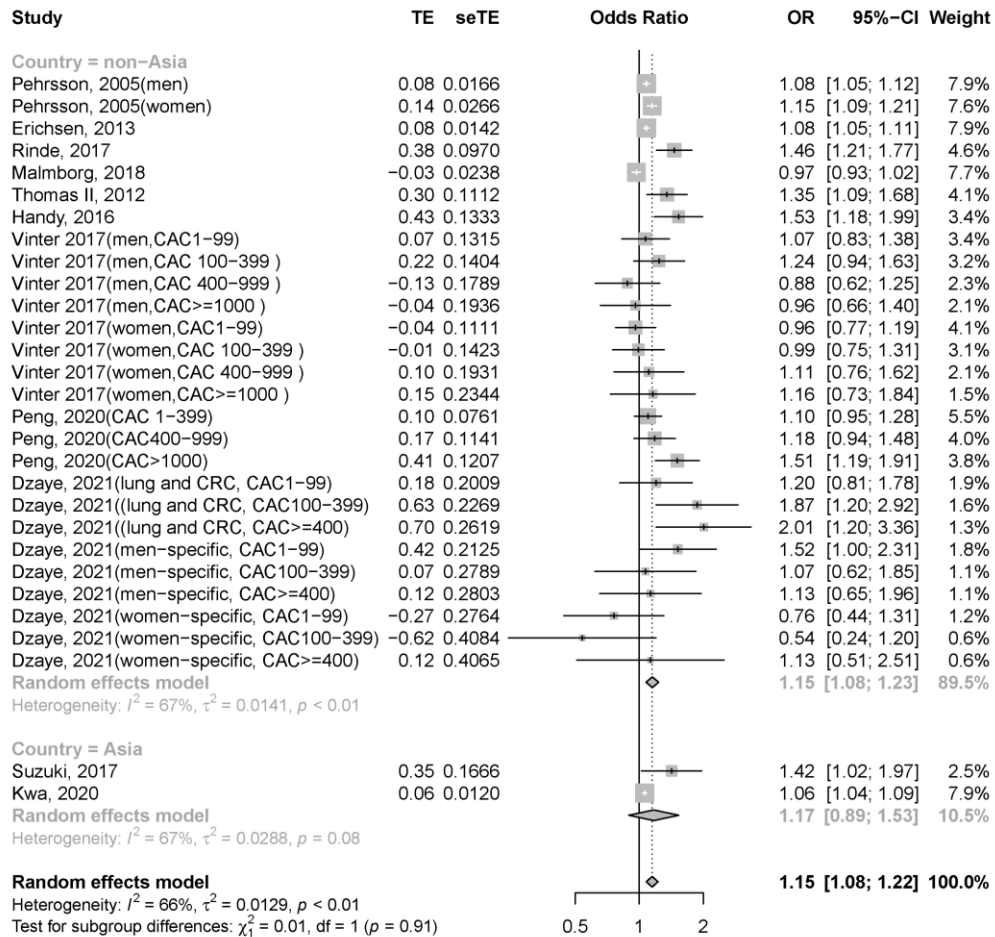

**Figure S2. Forest plot of incident cancer risk, comparing participants with CAD as those without CAD, with subgroup analysis by CAD type.** CAD, coronary artery disease; CI, confidence interval; MI, myocardial infarction; OR, odds ratio; se, standard error; TE, treatment effect.

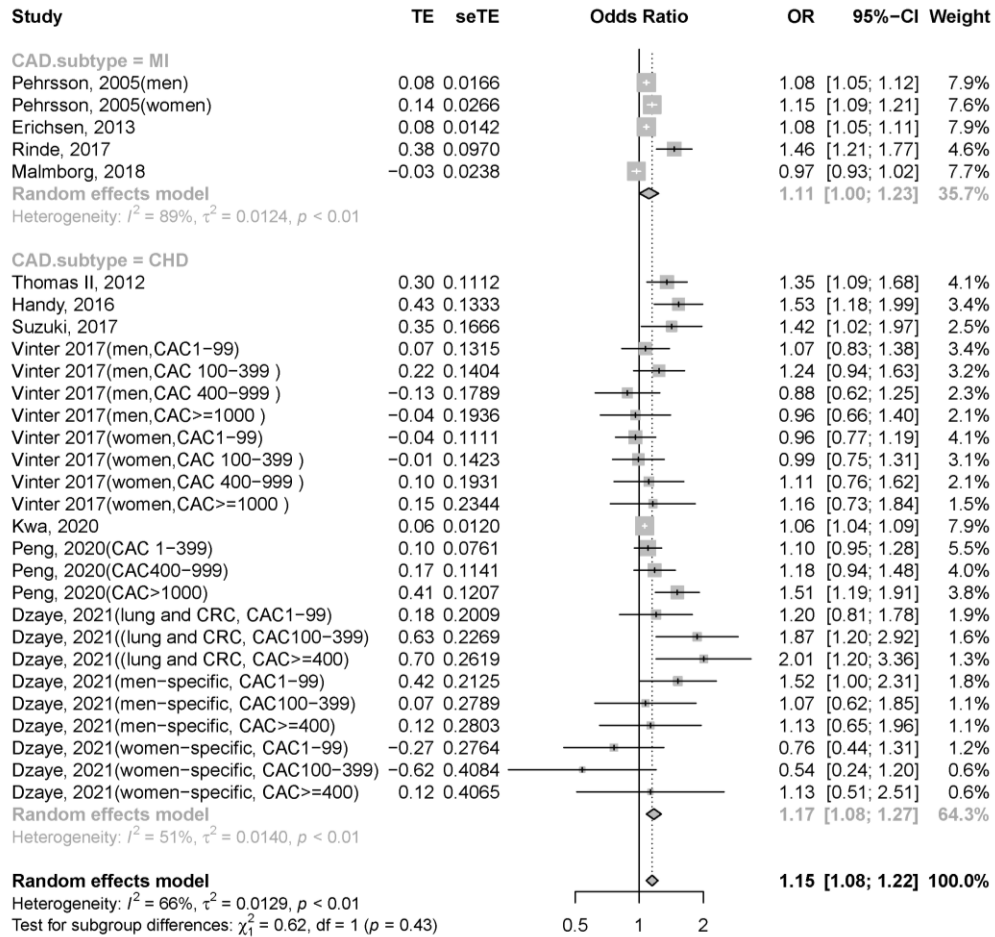

**Figure S3. Forest plot of incident cancer risk, comparing participants with CAD as those without CAD by individual cancer type.** CAD, coronary artery disease; CI, confidence interval; OR, odds ratio; se, standard error; TE, treatment effect.

**(1) Prostate cancer**

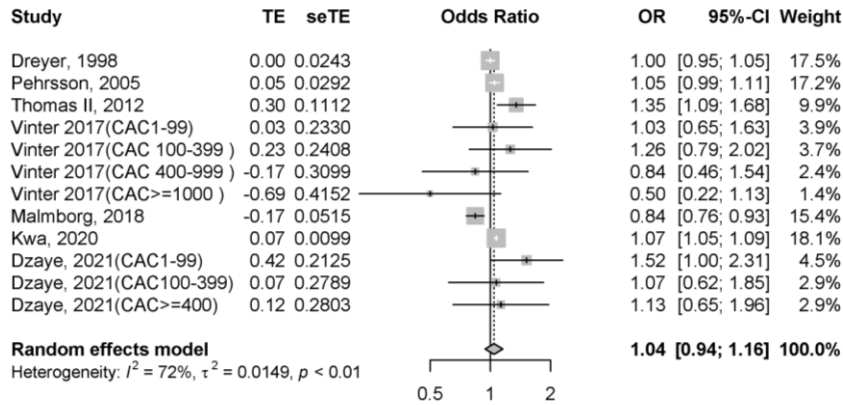

**(2) Liver cancer**

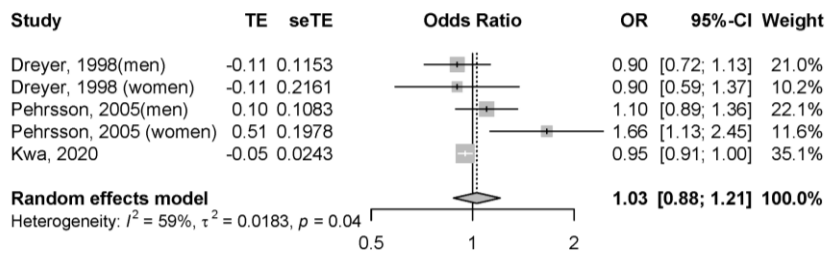

**Figure S4. Forest plot of incident cancer risk with follow-up time more than one year, comparing participants with CAD as those without CAD. CAD, coronary artery disease; CI, confidence interval; OR, odds ratio; se, standard error; TE, treatment effect.**

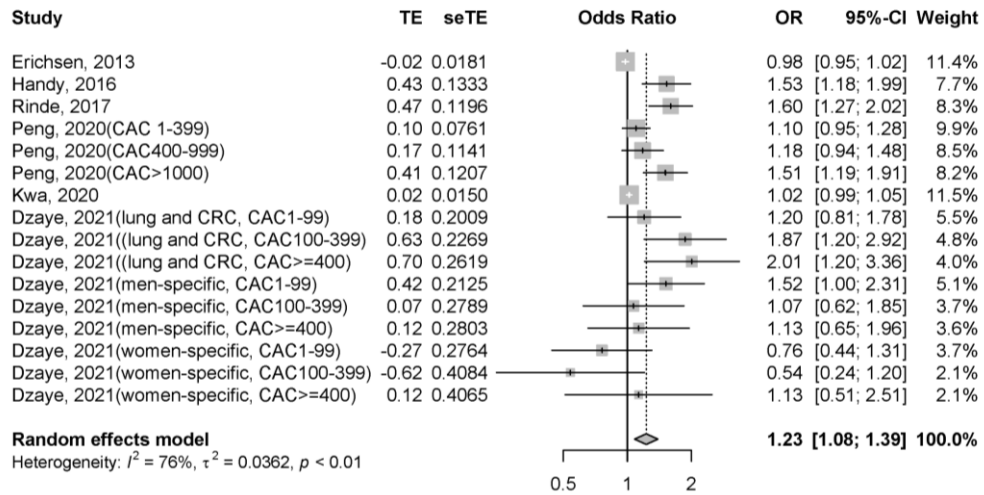



**Figure S5. The Funnel plot of the standard error by odds ratio of the studies included in the meta-analysis.**

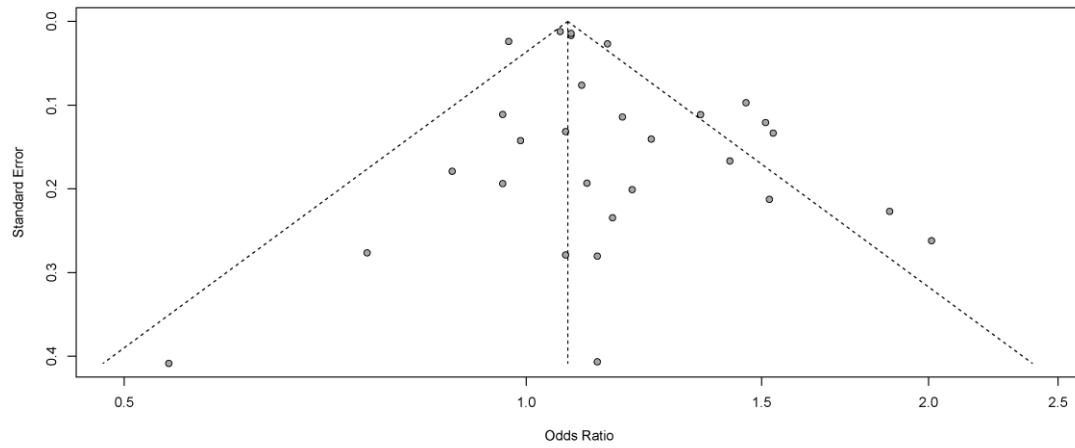

Egger's test, slope = 1.97,  $p = 0.06$
